# Supplementary material for: Glycoproteomic Study Reveals Altered Plasma Proteins Associated with HIV Elite Suppressors
Source: PubMed Central journal article supplement — Theranostics. 2014 Sep 18;4(12):1153–63. doi: 10.7150/thno.9510 (PMC4183994; doi:10.7150/thno.9510), 2014-09-18
Supplement: thnov04p1153s5.pdf [file thnov04p1153s5.pdf]

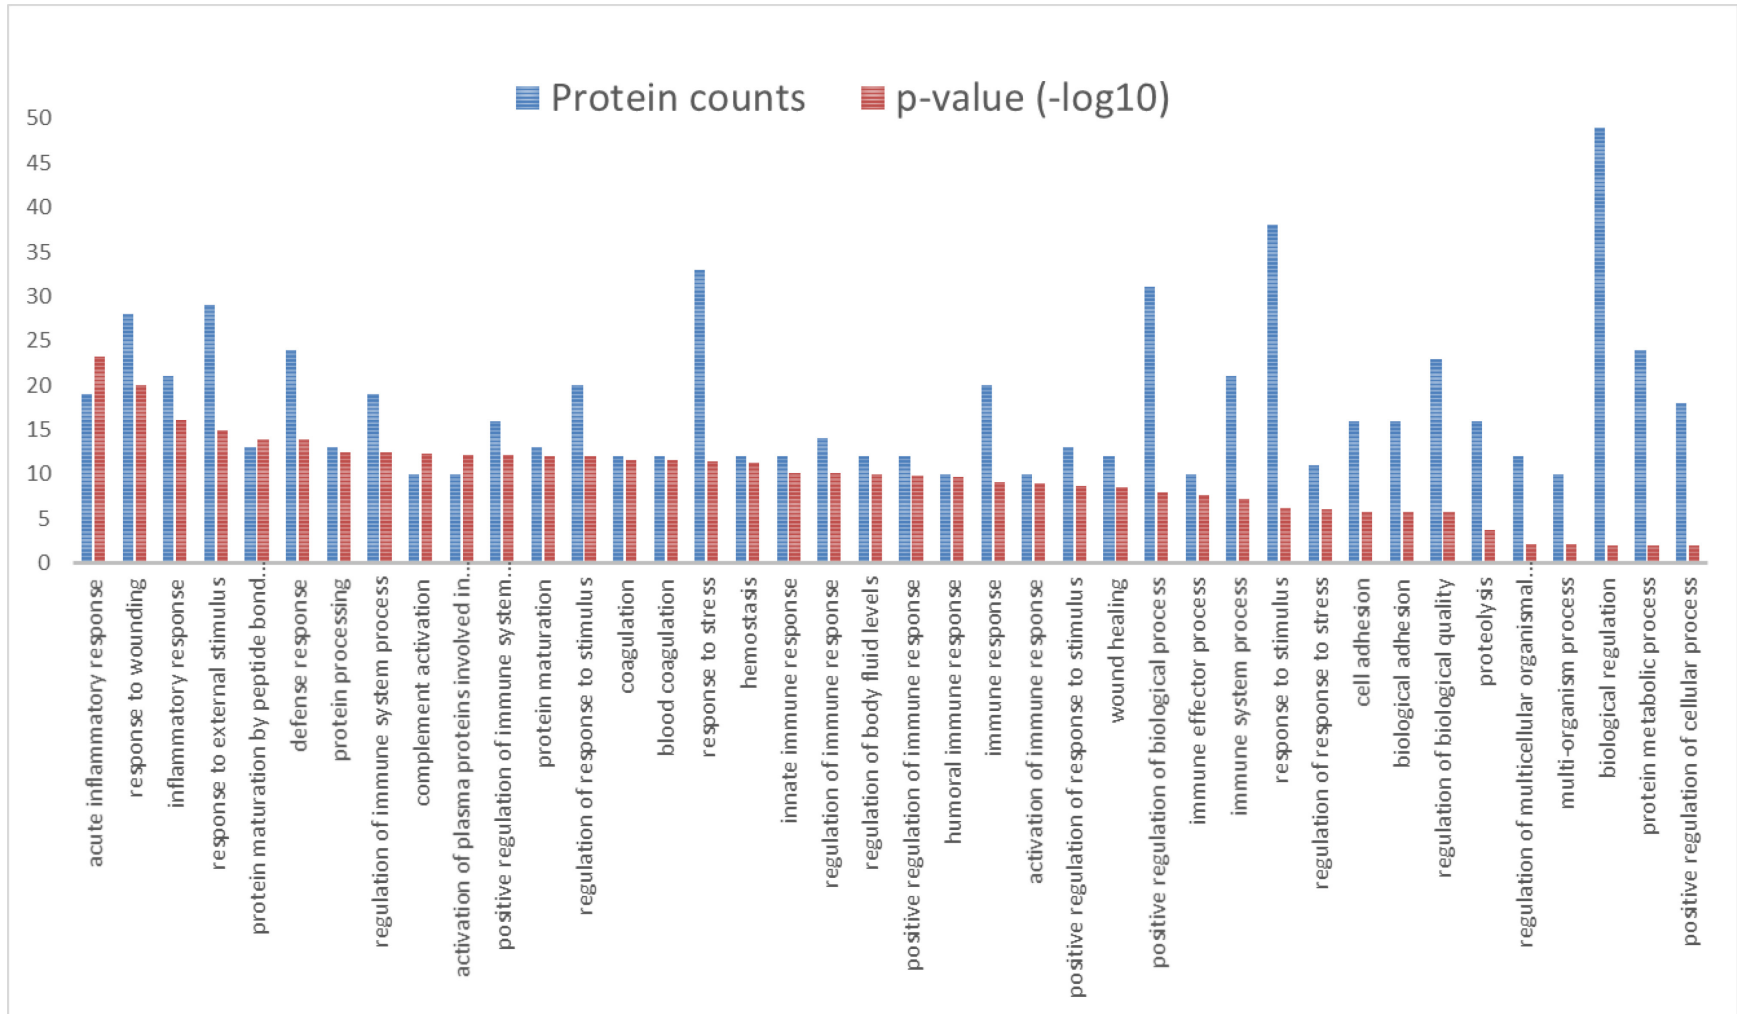

Supplementary Figure 1: Biological processes involving changed proteins between ES and others (HIV- and non-ES).
